# Supplementary material for: Reduction in Phosphoribulokinase Amount and Re-Routing Metabolism in Chlamydomonas reinhardtii CP12 Mutants
Source: MDPI journal article supplement (doi:10.3390/ijms23052710), 2022-02-28
Supplement: s1 [file s1]

# Supplementary Material

(a)

ATCACTTGAAGCAACGAAATGCCTCAGAAAAACGCTGACCGTCTTCAGCGGCCTATCGAAAAAGCGGGTCCCTCTCGCGAGCAT  
TTCGCAACGCTTAAACTCCAACCAGCTCGTCGGTCTCGCCGCAAGCGCCAGCGAGCGGGCGCCTTACTCAACCGGCTGCCACG  
CCTGCGTTTACGCCCTACGCCACTGGTTGCGACCCCTTATCGCTAAGACGTACGGCCGGCCATGCAGCCCGCTGCGAGCCGGT  
M Q P A A S R  
TGATAAAGAAGTTCGCGACCGTGCCCGGCGACAAACACACTATTACAAAAATGATGCTCACTAAGTCCGTTGTTATTAGCCGGCC  
L I K K F R T V P G D K H T I T K M M L T K S V V I S R P  
GGCCGTGCGCCCTGTCTCCACCCGCGCGGGTGGTGGTCCGCGCTAGCGGCCAGCCCGCTGTGGACCTGAACAAGAAGTTTCA  
A V R P V S T R R A V V V R A S G Q P A V D L N K K V Q  
GACGCCGTGAAGGAGGCTGAGGACGCTTGGCCCAAGGGCACCTCCGCGGTGAGGCGTTACTACTAGTCGCTTCAGTGGGGGCCAC  
D A V K E A E D A C A K G T S A  
ATCATCGGGCTTGAAAGGATCCTGGCTCGTCGGAACGCTTGGCAGACCCAGTTGGTGTTCCTCCGCGTCTGATCCAGCTAGG  
CTTCATTTTCACTGTGTACGATCAAGGAGACAGTAGATCACGCGCGCTCGGCCTGGCAGTGGTTCGATATATCGCGGACCGCTCC  
CTTCGCTTGCACAACGTTGCGTCTTGTCTTTTCTTACTCGAGCCTAAACACGCTCCTGTATTTTCATATACAGGACTGCGCCGTG  
D C A V  
GCCTGGGACACCGTTGAGGAGCTCAGCGCTGCTGTCTCGCACAGAAGGATGCCGTCAAGGCCGACGTCAACCTGACCGACCCCC  
A W D T V E E L S A A V S H K K D A V K A D V T L T D P  
TGGAGGCTTTCTGCAAGGATGCCCGGATGCCGATGAGTGCCGCGTGTAGTAGCCGCGCTGAATTGTGCTCTGCGCGTGTGCGCAT  
L E A F C K D A P D A D E C R  
TCGATCGCTCAGAAGTCTCCACATTTCCGAGACGACCTGCCTGAACAGCACCTCCTGGCTGCATCAGATGCCAGTGATAGCTG  
TGAATCGGTATTCGCTGGGTGAGGTCTCGACTCAAGGGTGTGACACCCGCGCCACCACTAGGTTCCGTTCCGGCGCCTGGGAC  
CCAGCCAACGCGCTTGGCGCATACCAACAGCGGCGTAACCTGCTCTCAATCTGTATGGCTGTGCTGACCCGTGTGTTTTCTCTC  
CCCGGTGCCCTGCCCAACAGCGTCTACGAGGATTAAGCAGCTCACCAACACGCTTTGGGCGGGCGCAAGCCCTCGTGGCAGC  
V Y E D \*  
AGCGGCGCTAGTGACGACGTTGGTGCCTTGAGGAAGGACAACCTAGGTGGTTGAGTGGCGCACGGTATGGCGGGTGCACAATGC  
AACCGGCCAGCTGGGCGAAGGGAGTTTCGAGCGGTGCAGGTGTGTGGGAGCCTGGAGCCCGCGTTCCGTCGGACGTTCCGCCGCTG  
CAGATTTGCGCAGCTGGCGCTTCTTTTCGGAGTTTCGGGGTAGGATAGGACCAGCCCTTGATCGTGGCAGACCCGAGCAGTTTCG  
GAGCGATGTGGTGAGCAGCAGGGCCGGGCGGGCGTCCGGCTCCGTGTCCTGTAGTTTGGTGTGGGGCACTGTTGGCCCGCT  
TGTACCGGTTTCCCTGTTGTACAGAGTCGTCGGTGTGACACATGATGAAAGGAATTCATGCATCATGGTACAAAATATGAAT  
GTAACGGCGCAAGCCGTGCACGCACAAGCTGTCTGATGATAGCGTAATGGTTTCAATGCGGGCTGCCGTTTCATGAGGATGGGTT  
CAGTGACAATTCGGGTGGGCGAGCGCATGGAGCGTGAAGAAATAGCAGTGACCGCCAGCAGGAAAACCTCCTGCCTACGGGAATCT  
CAGCCAAGGAATGCGGCATGGCGAAGCCTGTGAGCAACCCGACACGGCGAAGCAGTGACACGGCCAAAGCTACAGCGGCTCAGTA  
GCACGATTAGCTTTTGGCCAGGCGCACGTGAGCGCACTGCTTTGTATTACGCGCTGCTATCTGTTTCCACACTTGCTTCGCCC  
ACGCCTTACCTGCAACTTCCGTGTTCTGTCAC

(b)

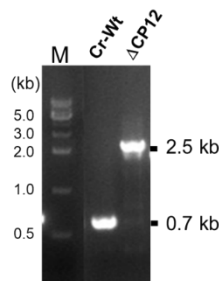

(c)

**CP12-Cr wild type**

gRNA-Target ▼

5' - GCGGCGCATGCAGCCCGCTGCGAGCGGTTGATAAAGAAGTTCGCGACCGTGC... -3'

M Q P A A S R L I K K F R T V ...

**ΔCP12-Cr mutant**

*aph7* gene expression cassette

5' - CCGGCGCATGCAGCCCGCTGATGATTCCGCTCCGTGTAATGGAGGCGCTCGTTGATCTGAGGCC... ..

M Q P A D D S A P C K W R R S L I \*

.. (Hyg<sup>R</sup>) .. ATGTAACCTAGTTGATGGTACTAGCGGTTGATAAAGAAGTTCGCGACCGTGC... -3'

**Figure S1:** The analysis of the genome sequence  $\Delta$ CP12-Cr and WT-Cr (a) The genomic sequence (Cre08.g380250) of WT-Cr. Blue and black letters indicate the untranslated region and intron sequence, respectively, and red letters represent exon and amino acid sequences. The underline indicates the twenty bp-long gRNA target sequence. (b) To confirm targeted mutation of the CP12 gene, cells were subjected to genomic PCR with specific primers adjacent to sgRNA target sites in wild type and  $\Delta$ CP12-Cr. (c) The edited genome sequence of a  $\Delta$ CP12-Cr. The genotype of CP12 was determined by Sanger sequencing. The  $\Delta$ CP12-Cr has a DNA fragment of the *aph7* gene expression cassette inserted within the gRNA target sequence.

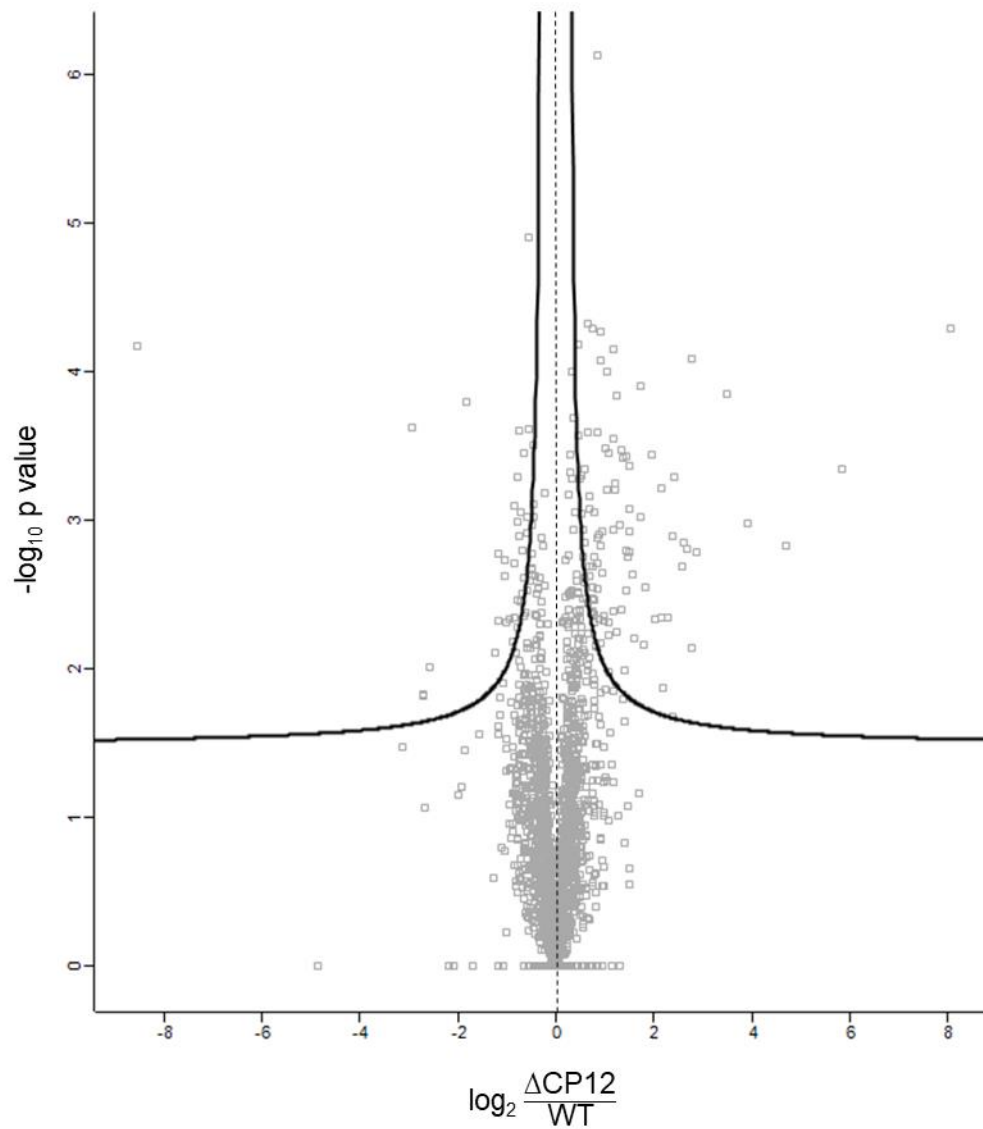

**Figure S2:** Volcano plot of the proteomic data. The plot represents the fold changes in relative abundance for each protein (empty square). The x-axis shows difference of protein abundance in  $\Delta\text{CP12-Cr}$  versus  $\text{WT-Cr}$  (in  $\log_2$ ). The y-axis shows the  $-\log_{10} p$  value. The dotted vertical line indicates unchanged protein amount. The continuous lines show the threshold above which the proteins are in statistically significant differential amount (two-sample  $t$ -test with a permutation-based false discovery rate set at 0.01 and  $p$ -value adjusted using a scaling factor  $s_0$  to a value of 0.1) that are on the two top left and top right corners.

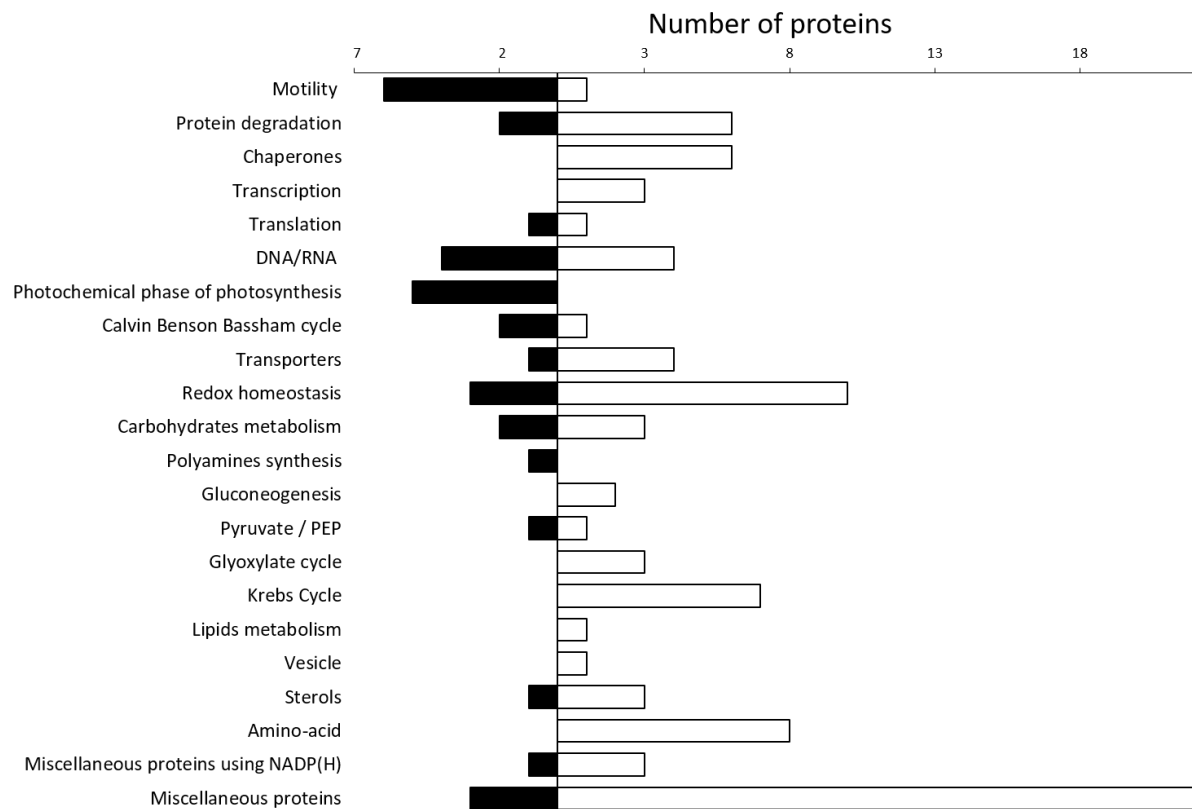

**Figure S3:** Number of proteins increasing or decreasing in  $\Delta$ CP12-Cr strain, all metabolic pathways are shown. The proteins that are more abundant in  $\Delta$ CP12-Cr compared to WT-Cr are counted in the white bars, the protein that are less abundant in  $\Delta$ CP12-Cr compared to WT-Cr are counted in the dark bars.

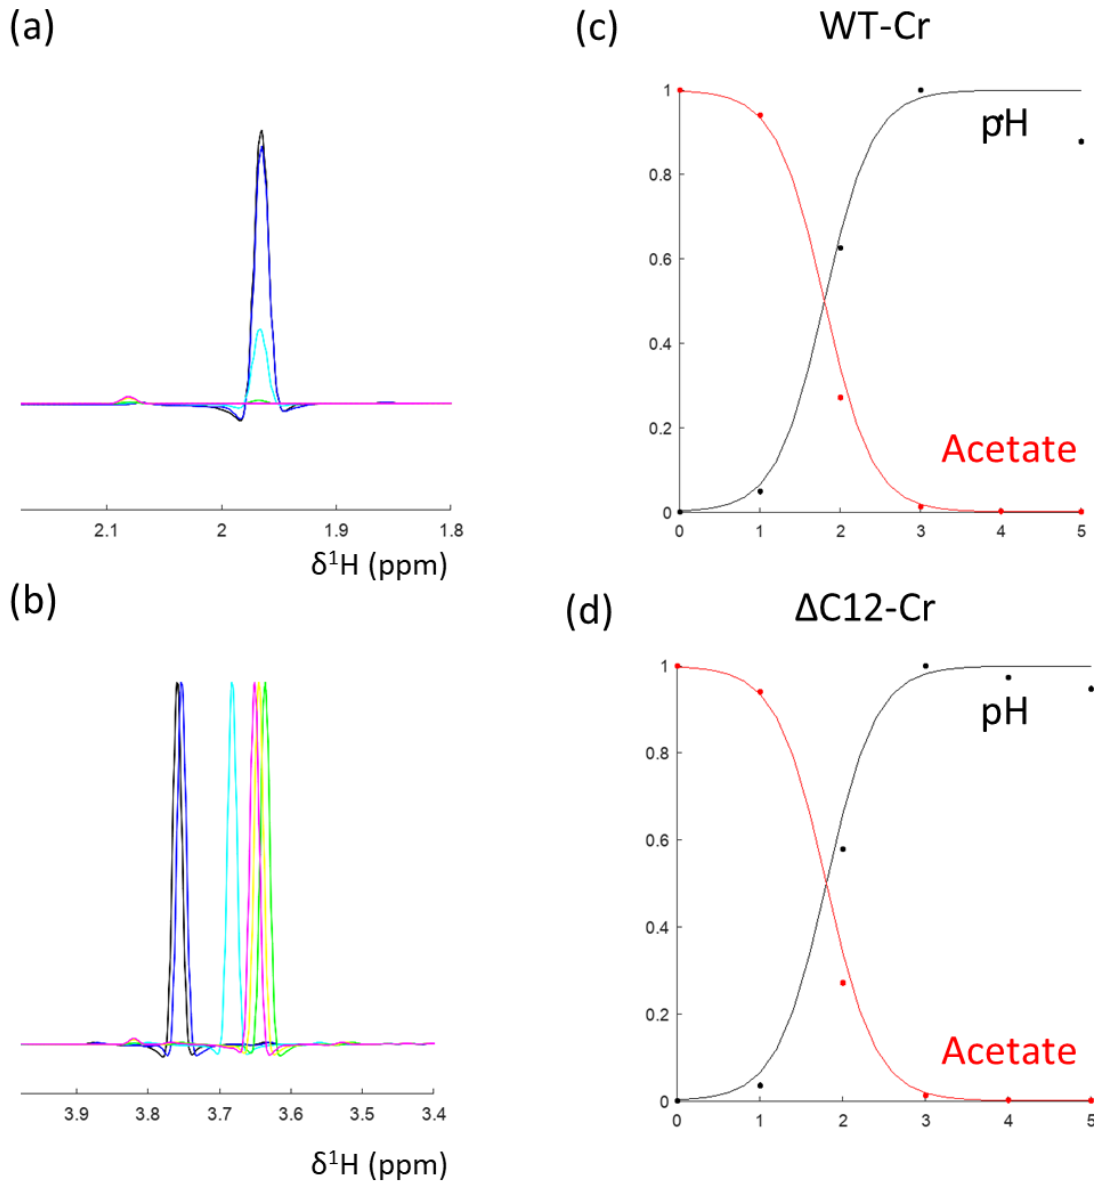

**Figure S4:** Acetate concentration and pH variation in mixotrophic precultures. (a and b) Superimposition of  $^1\text{H}$  1D NMR spectra of culture medium collected at time 0 (black), and after 1, 2, 3, 4 and 5 days of pre-culture (in blue, cyan, green, yellow and magenta respectively). In (a), the region of the acetate methyl resonance is shown. The decrease in intensity of this resonance is related to the consumption of acetate during mixotrophic growth. In (b), the region of the Tris(hydroxymethyl)aminomethane methylene resonance is shown. The shift of this resonance is related to a variation of pH from 7.4 to a more basic value because of photosynthesis  $\text{CO}_2$  consumption during mixotrophic growth. (c and d) Relative acetate amount and pH variation during mixotrophic growth of WT-Cr (c) and  $\Delta\text{CP12-Cr}$  (d). After four days of pre-culture, the acetate has been consumed from the medium. We collected these cultures after five days, when no acetate is left in the medium, and then subcultured them in phototrophic conditions.
